# Supplementary material for: Impact of ASUMA Intervention on HIV Risk Behaviors among Puerto Rican Adolescents
Source: MDPI journal article supplement (doi:10.3390/ijerph13010060), 2015-12-22
Supplement: s1 [file s1]

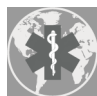

**Supplementary Materials: ASUMA Adolescent Curriculum**

**Table S1.** Curriculum of the study: a supportive model for HIV risk reduction in early adolescent (ASUMA project).

| Title of Curriculum Unit                             | Objectives                                                                                                                                                                                                                  | Strategies                                                                                                                                                                                                                                                                                       | Evaluation                                                                                                                                                                              |
|------------------------------------------------------|-----------------------------------------------------------------------------------------------------------------------------------------------------------------------------------------------------------------------------|--------------------------------------------------------------------------------------------------------------------------------------------------------------------------------------------------------------------------------------------------------------------------------------------------|-----------------------------------------------------------------------------------------------------------------------------------------------------------------------------------------|
| Unit 1—HIV/AIDS attitude knowledge and vulnerability | <ul style="list-style-type: none"> <li>• Participants will increase their HIV/AIDS knowledge.</li> <li>• Participants will decrease their invulnerability to HIV/AIDS.</li> </ul>                                           | <ul style="list-style-type: none"> <li>• Clue activity</li> <li>• Peer group discussion</li> <li>• Brainstorm</li> <li>• Audiovisual presentation</li> <li>• Debate</li> <li>• Critical thinking</li> <li>• Round-Robin</li> <li>• Patient testimony</li> <li>• Individual reflection</li> </ul> | <ul style="list-style-type: none"> <li>• Pre and Post-test and workshop evaluation.</li> <li>• Evaluation of outcome activities.</li> <li>• Follow-up questionnaire.</li> </ul>         |
| Unit 2—HIV/AIDS risk                                 | <ul style="list-style-type: none"> <li>• Participants will increase their resilience to HIV/AIDS risk behaviors.</li> <li>• Participants will decrease their invulnerability to HIV/AIDS risk vulnerability.</li> </ul>     | <ul style="list-style-type: none"> <li>• Audiovisual presentation</li> <li>• Individual critical thinking</li> <li>• Peer discussion</li> <li>• Critical discussion</li> <li>• Group discussion</li> <li>• Round-Robin</li> </ul>                                                                | <ul style="list-style-type: none"> <li>• Pre and Post-test and workshop evaluation.</li> <li>• Evaluation of outcome activities.</li> <li>• Self-administered questionnaire.</li> </ul> |
| Unit 3—Self-esteem: “I’m important”                  | <ul style="list-style-type: none"> <li>• Participant will increase their self-esteem and self-efficacy.</li> </ul>                                                                                                          | <ul style="list-style-type: none"> <li>• Individual reflection</li> <li>• Dramatization</li> <li>• Peer discussion</li> <li>• Group discussion</li> <li>• Role-Play</li> <li>• Critical thinking</li> <li>• Bowl-Fish</li> <li>• Critical discussion</li> </ul>                                  | <ul style="list-style-type: none"> <li>• Pre and Post-test and workshop evaluation.</li> <li>• Evaluation of outcome activities.</li> <li>• Self-administered questionnaire.</li> </ul> |
| Unit 4—Peer pressure: “Because I’m value person”     | <ul style="list-style-type: none"> <li>• Participants will describe how peer pressure could have a negative influence on them.</li> <li>• Participants will develop a plan to resist the negative peer pressure.</li> </ul> | <ul style="list-style-type: none"> <li>• Individual reflection</li> <li>• Visual presentation</li> <li>• Critical thinking</li> <li>• Discussion group</li> <li>• Role-Play</li> <li>• Group discussion</li> </ul>                                                                               | <ul style="list-style-type: none"> <li>• Pre and Post-test and workshop evaluation.</li> <li>• Evaluation of outcome activities.</li> </ul>                                             |

Table S1. Cont.

| Title of Curriculum Unit                                                                  | Objectives                                                                                                                                                                                              | Strategies                                                                                                                                                                                                                   | Evaluation                                                                                                                              |
|-------------------------------------------------------------------------------------------|---------------------------------------------------------------------------------------------------------------------------------------------------------------------------------------------------------|------------------------------------------------------------------------------------------------------------------------------------------------------------------------------------------------------------------------------|-----------------------------------------------------------------------------------------------------------------------------------------|
| Unit 5—Booster: “I can prevent risky situations”                                          | <ul style="list-style-type: none"> <li>Participants will develop skills on how to manage sensation seeking.</li> </ul>                                                                                  | <ul style="list-style-type: none"> <li>Critical thinking</li> <li>Group discussion</li> <li>Spider web</li> <li>Brainstorm</li> <li>Discussion group</li> <li>Cardboard</li> </ul>                                           | <ul style="list-style-type: none"> <li>Pre and Post-test and workshop evaluation.</li> <li>Evaluation of outcome activities.</li> </ul> |
| Unit 6—“I can perceive the media negative influence and prevent HIV risky behavior if...” | <ul style="list-style-type: none"> <li>Participants will discriminate the media influence.</li> <li>Participants will develop skills to manage media influence and prevent risky situations.</li> </ul> | <ul style="list-style-type: none"> <li>Critical thinking</li> <li>Discussion group</li> <li>Collage</li> <li>Peer group discussion</li> <li>Brainstorm</li> <li>Situation</li> </ul>                                         | <ul style="list-style-type: none"> <li>Pre and Post-test and workshop evaluation.</li> <li>Evaluation of outcome activities.</li> </ul> |
| Unit 7—“I’m able to resist HIV risk behavior”                                             | <ul style="list-style-type: none"> <li>Participants will increase participants’ self-efficacy skills to avoid HIV risks behaviors.</li> </ul>                                                           | <ul style="list-style-type: none"> <li>Game</li> <li>Peer Group Discussion</li> <li>Individual Critical thinking</li> <li>Audiovisual</li> </ul>                                                                             | <ul style="list-style-type: none"> <li>Pre and Post-test and workshop evaluation.</li> <li>Self-administered questionnaire.</li> </ul>  |
| Unit 8—“I’m ready for my future”                                                          | <ul style="list-style-type: none"> <li>Participants will demonstrate self-efficacy skills to avoid HIV risks behaviors.</li> </ul>                                                                      | <ul style="list-style-type: none"> <li>Role Play</li> <li>Drama</li> <li>Song Story</li> <li>Short film</li> <li>Peer Group Discussion</li> <li>Dynamic: Mail to the future</li> <li>Individual Critical Thinking</li> </ul> | <ul style="list-style-type: none"> <li>Pre and Post-test and workshop evaluation.</li> <li>Evaluation of outcome activities.</li> </ul> |

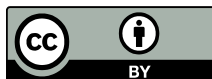

© 2015 by the authors; licensee MDPI, Basel, Switzerland. This article is an open access article distributed under the terms and conditions of the Creative Commons by Attribution (CC-BY) license (<http://creativecommons.org/licenses/by/4.0/>).
